# High incidence of stroke in COVID-19 patients

Jingyu Chen<sup>1,2,\*</sup>, Yazhou Wu<sup>3,\*</sup>, Zhi Chen<sup>2</sup>, Bin Yi<sup>1,4</sup>, Lili Zhang<sup>1,5</sup>, Changlin Yin<sup>1,6</sup>, Hua Feng<sup>2</sup>

<sup>1</sup>Department of Intensive Care Unit, Taikangtongji Hospital (Wuhan), Wuhan 430040, People's Republic of China

<sup>2</sup>Department of Neurosurgery, Southwest Hospital, Army Medical University (Third Military Medical University), Chongqing 400038, People's Republic of China

<sup>3</sup>Department of Health Statistics, College of Preventive Medicine, Army Medical University (Third Military Medical University), Chongqing 400038, People's Republic of China

<sup>4</sup>Department of Anesthesia, Southwest Hospital, Army Medical University (Third Military Medical University), Chongqing 400038, People's Republic of China

<sup>5</sup>Neurology Department, Daping Hospital, Army Medical University, Chongqing 400038, People's Republic of China

<sup>6</sup>Department of Intensive Care Unit, Southwest Hospital, Army Medical University (Third Military Medical University), Chongqing 400038, People's Republic of China

\*Co-first authors

**Correspondence to:** Changlin Yin, Hua Feng; email: [ycl0315@163.com](mailto:ycl0315@163.com), <https://orcid.org/0000-0002-4505-263>; [283686484@qq.com](mailto:283686484@qq.com), <https://orcid.org/0000-0003-4489-9217>

**Keywords:** COVID-19, incidence rate, stroke, D-dimer

**Received:** May 16, 2020

**Accepted:** August 22, 2020

**Published:** November 20, 2020

**Copyright:** © 2020 Chen et al. This is an open access article distributed under the terms of the [Creative Commons Attribution License](https://creativecommons.org/licenses/by/3.0/) (CC BY 3.0), which permits unrestricted use, distribution, and reproduction in any medium, provided the original author and source are credited.

## ABSTRACT

**A retrospective analysis of 11 COVID-19 patients complicated with stroke was performed. It was found that the incidence of stroke in patients with COVID-19 was significantly higher than the average level of the general population ( $P=0.003$ ), and the D-dimer levels of 11 stroke patients were significantly higher than other patients ( $P=0.004$ ). The significant increase of D-dimer can be used as an early warning indicator of cerebral infarction. It is critical to have a response plan for treating acute stroke in COVID-19 patients.**

## INTRODUCTION

Stroke is the second most common cause of death worldwide and the third most common cause of disability [1], while the incidence of stroke in China is the highest in the world [2]. Since the first case of coronavirus disease 2019 (COVID-19) was reported in December 2019, the long incubation period and strong infectivity have caused its rapid spread worldwide [3]. Our hospital is a specialist hospital for treating COVID-19 designated by the Chinese government. The hospital admits and treats COVID-19 patients diagnosed by various clinical methods. In this study, we reported the cases of stroke in the patients diagnosed with COVID-19 from 2020.2.13 to 2020.3.28, and we found that the incidence of stroke among these patients was significantly higher than that before the pandemic in China [4]. COVID-19 is currently a global pandemic

and the occurrence of more COVID-19 patients with concurrent stroke was observed in our hospital. This report summarizes the epidemiological characteristics of these cases, and the diagnosis and treatment characteristics during the outbreak. Our report may provide valuable information, experience and lessons for treating similar patients in the future.

## RESULTS

A total of 2037 patients, between 17-99 years old, were admitted during the 45-day period from February 13, 2020 to March 27, 2020, including 918 males and 1119 females. In this study, 11 (0.54%) patients with coronavirus pneumonia were diagnosed with stroke based on neurological symptoms and confirmation by imaging. All 11 patients were local residents in Wuhan city. According to the literature [2], the average

incidence rate of stroke in China is 345.1/100000/year. We found that the age-standardized incidence of stroke in patients with COVID-19 was significantly higher than the average level in China ( $\chi^2=8.620$ ,  $P=0.003$ , Table 1). All 2037 patients were examined for blood D-dimer levels after admission, and the median D-dimer level in 11 patients before stroke was 889.00 ng/ml (Interquartile Range 787), which was significantly higher than that of other 2026 patients (median value 696.00 ng/ml, Interquartile Range 298.3,  $Z=-2.846$ ,  $P=0.004$ , Table 2). Ten patients from this group were negative for nucleic acid tests (with an interval of at least 1 day) and positive for antibody IgG within 14 days after admission. Among them, 2 cases progressed to severe bacterial pneumonia and respiratory failure, and were given tracheal intubation ventilator to assist breathing. These two patients were not improved in consciousness and limb movement disorders, and were transferred to other hospitals for further treatment. Two other patients with no improvement in respiratory symptoms and improved neurological symptoms, as well as five patients with improved respiratory symptoms and neurological dysfunction were also transferred to other hospitals for further treatment. One patient with intracranial hemorrhage underwent bilateral ventricle drainage surgery 15 hours after hemorrhage, and continued cerebrospinal fluid drainage after surgery, who died 1 day after surgery. In addition, one patient whose nucleic acid test was still positive for the re-examination recovered from limb disability and continued to be treated in our hospital.

## DISCUSSION

Increased cases of COVID-19 with concurrent stroke have been reported in this outbreak. The clinical study in New York showed that Large-Vessel stroke was presented as a feature of 5 Covid-19 patients of 33 to 49 years old. The incidence of young patients who didn't have any risk factors for strokes and mortality was much higher than expected [5]. Stroke includes cerebral hemorrhage and cerebral ischemia. About 80% of strokes are caused by ischemic cerebral infarction and 20% are caused by cerebral hemorrhage [6]. The COVID-19 patients with stroke in this study included 10 cases of cerebral ischemic stroke and 1 case of hemorrhagic stroke, which had roughly the same proportion as the general population. The age-standardized incidence of stroke in China was estimated to be 345.1/100,000 person/year [2]. The strategy to deal with the epidemic in China is comprehensive test, full collection of patients and fully covered treatment costs, thus the patients are highly cooperative and will be admitted to the hospital once they are diagnosed. There was no difference in the hospital visit rate due to factors such as age and treatment costs. The incidence

rate of stroke in this study was significantly higher than the previous incidence rate in China ( $P=0.003$ ), whereas existing data show that China is the Country with the highest incidence of stroke in the world [2].

Although the Severe acute respiratory syndrome coronavirus 2 (SARS-CoV-2) mainly attacks the lungs of patients, some patients with COVID-19 in China have developed symptoms of intracranial infections such as headache, epilepsy, and unconsciousness. Some even have symptoms related to COVID-19 after the first symptom of intracranial infection. Autopsy results of patients with COVID-19 showed that the brain tissue was hyperemic and edematous, and some neurons degenerated [7]. Neurologic injury has been confirmed in the infection of other CoVs such as in SARS-CoV and MERS-CoV. The researchers detected SARS-CoV nucleic acid in the cerebrospinal fluid of those patients and also in their brain tissue on autopsy [8]. Some researchers obtained the SARS-CoV-2 genome sequence in cerebrospinal fluid samples of patients with COVID-19 accompanied by neurological symptoms. In a study of 214 patients with COVID-19, neurologic symptoms were seen in 36.4% of patients and were more common in patients with severe infection (45.5%) according to their respiratory status, which included acute cerebrovascular events, impaired consciousness, and muscle injury [9]. Infection is related to the increased risk of stroke. The virus itself and the inflammatory response and release of inflammatory mediators after infection may all lead to an increased risk of stroke. Studies that used case cross-over analysis and conditional logistic regression observed that every infection type was associated with an increased likelihood of acute ischemic stroke, and respiratory infections were associated with subarachnoid hemorrhage [10]. In addition, SARS-CoV-2 was also found in autopsy brain tissue. More and more data also suggest that inflammation increases the risk of stroke. A meta-analysis included the results of 54 prospective studies confirmed that C-reactive protein concentration was associated with the long-term risk of cardiovascular events (including ischemic stroke) [11]. The C-reactive protein of all patients in this group of cases before stroke was higher than normal value. The white blood cell count is associated with ischemic events in high-risk groups, including stroke, myocardial infarction, and vascular death [12]. A prospective longitudinal cohort study also found that an increase in white blood cell count was independently associated with an increased risk of ischemic stroke among participants without a stroke history [13]. Six patients in this group had a white blood cell count higher than normal before the stroke.

Increased level of fibrinogen is significantly associated with stroke risk, increased stroke severity, and poor stroke outcomes [14]. Many studies have investigated

**Table 1. Comparison of incidence rate.**

|          | This group |             |             |           | Literature [2] |               |        |             | Standardized population | This group        |                   | Literature [2]    |                   |
|----------|------------|-------------|-------------|-----------|----------------|---------------|--------|-------------|-------------------------|-------------------|-------------------|-------------------|-------------------|
|          | Stroke     | Control     | N1          | Incidence | Stroke         | Control       | N1     | Incidence   |                         | Standardized rate | Standardized rate | Standardized rate | Standardized rate |
| <50 year | 1          | 529         | 530         | 0.001887  | 152            | 288990        | 289142 | 0.00525693  | <b>289672</b>           | 0.0018868         | 0.000525693       |                   |                   |
| >50 year | 10         | 1497        | 1507        | 0.006636  | 10             | 1497          | 1507   | 0.006636    | <b>193052</b>           | 0.0066357         | 0.007784072       |                   |                   |
| Total    | <b>11</b>  | <b>2026</b> | <b>2037</b> | 0.0054    | <b>1643</b>    | <b>479044</b> | 480687 | 0.003418025 | <b>482724</b>           | 0.003786          | 0.003428479       |                   |                   |

**Table 2. Comparison of D-dimer.**

|         | N    | Mean   | Std. Deviation | Minimum | Maximum | Median | Interquartile Range | Z     | P     |
|---------|------|--------|----------------|---------|---------|--------|---------------------|-------|-------|
| stroke  | 11   | 769.64 | 336.04         | 640.0   | 4486.0  | 889.0  | 787.0               | 2.846 | 0.004 |
| control | 2026 | 694.60 | 4.08           | 219.0   | 1994.0  | 696.0  | 298.3               |       |       |

the role of D-dimer as a marker of hypercoagulable state in stroke. In a case-control study involving 204 patients with ischemic stroke, the D-dimer levels of 104 patients with active cancer were significantly higher than that of 100 patients with inactive cancer [15], and even the D-dimer level of patients with cardiogenic stroke was also increased [16]. The D-dimer is a product of fibrinogen degradation. The elderly patients with COVID-19 accounted for the majority, especially in critically ill patients, and the D-dimer was significantly increased after the onset [17]. In this study, the D-dimer level before stroke was higher than the normal value, and also higher than the average value of that in other patients without stroke ( $P=0.004$ ), indicating that patients with high D-dimer may be more likely to develop stroke. COVID-19 patients with severe infection had higher D-dimer levels than that of patients without severe infection [9]. This may be the reason why patients with severe infection are more likely to develop cerebrovascular disease. Recently, there are also some reported cases of venous sinus and deep vein thrombosis that attracted our attention. Inflammatory response caused by viral infections can lead to endothelial dysfunction and coagulation activation, which may cause thrombosis and fibrinolysis. Therefore, SARS-CoV-2 infection is associated with hypercoagulability and the potential risk of thrombosis. In the case of viral infections, antiphospholipid antibodies may be present briefly at low levels, which could be a post-infection mechanism for further extensive thrombosis. In addition to causing endothelial damage and systemic inflammatory reactions, SARS-CoV-2 infection may also promote the prethrombotic state of patients with venous occlusion, resulting in a large amount of blood clotting. However, the pathophysiology of COVID-19 complicated with thrombosis is still uncertain, and further research is needed.

In addition, it is worth mentioning that COVID-19 is highly contagious. During the outbreak, patients need to

be admitted and treated to achieve the purpose of isolation. China, the United States, and many European countries with severe epidemics have adopted different strategies to admit COVID-19 patients. Since most of the medical structures for centralized treatment are temporarily established or modified, the personnel, facilities, and medicinal materials are mainly focused on the respiratory system and critical care caused by the coronavirus. As a result, there is a lack of personnel and equipment for stroke diagnosis and treatment, such as neurosurgeons, CT and nuclear magnetic resonance used for cerebral vascular imaging examination, neurosurgery operation room, and intervention room. Factors such as infection control and utilization of medical resources also need to be considered for outpatient transfer. In addition, surgery, thrombolysis, and thrombectomy for some acute strokes have strict time windows, and it is necessary to practice in advance to complete neurosurgery or endovascular treatment under enhanced protection.

In this study, the patient with cerebral hemorrhage (case 3) received surgical treatment only 15 hours after CT examination, while 2 patients with large-area infarction (case 1, 2) missed the time window for intravascular treatment. Thus, it is necessary to establish a set of plans in advance for responding to acute stroke in the hospital and to improve the related personnel and equipment configuration, or to establish a fast, safe, and controllable transfer mechanism according to different conditions in the epidemic area.

## CONCLUSIONS

The incidence of stroke in patients with COVID-19 was significantly higher than that of the general population. The significant increase of D-dimer can be used as an early warning indicator of cerebral infarction. A response plan for acute stroke is necessary.

## Limitations

This study has several limitations. First, only 11 patients were studied, which could cause biases in clinical observation. More patients, and even other reports should be considered. Second, because CT is the only feasible means for imaging examination during the outbreak of COVID-19, the condition of cerebrovascular vessels cannot be fully assessed. Third, because most patients were still hospitalized and information regarding clinical outcomes was unavailable at the time of analysis, it was difficult to assess the effect of these neurologic manifestations on their outcome, and continued observations of the natural history of disease are needed.

## MATERIALS AND METHODS

### General information

In this retrospective study, 11 patients with COVID-2019 combined with stroke who were admitted from February 13, 2020 to March 28, 2020 were included. It accounted for 0.54% of the 2037 (17-99 years old) patients with the coronavirus pneumonia admitted in the same period. The patients were 46-89 years old, with an average of 73.55 years old, including 5 males and 6 females; all patients were local residents of Wuhan and had a clear history of close contact with confirmed patients (Table 3).

### Case inclusion criteria

1. Positive for the nucleic acid detection of the COVID-19 virus (oropharyngeal swab or blood); 2. Having been to the epidemic area or having a clear history of close contact with patients with COVID-19; 3. Confirmed diagnosis of the COVID-19 with new neurological symptoms and CT examination that showed abnormal imaging.

### Clinical manifestations

According to the report from World Health Organization(WHO) and Centers for Disease Control and Prevention (CDC), patients with COVID-19 may experience a wide range of symptoms, including fever or chills, cough, shortness of breath or difficulty to breathe, fatigue, muscle or body aches, headache, loss of taste or smell, sore throat, congestion or runny nose, nausea or vomiting, and diarrhea.

All the patients in our study had onset of cough, sputum, fever (7-21 days), and presented varying degrees of respiratory dysfunction during the course of the disease. Some critically ill patients developed

respiratory failure or even multiple organ failure. In the course of treatment after diagnosis, all patients experienced neurological symptoms, five patients had sudden and persistent disturbance of consciousness, ten patients had language dysfunction and limb movement disorders. Two patients experienced a disappearance of the pupil reflection, and one patient had eye movement to the left side (Table 4).

### Classification of COVID-19

Mild type: the clinical symptoms were mild and no radiological manifestations of pneumonia; common type: the clinical symptoms included fever and respiratory symptoms, and had radiological manifestations of pneumonia; severe type: patients showing respiratory distress, and pulmonary imaging showed over 50% significant progress of the lesion within 24-48 hours; critical type: patients showing respiratory failure and needed mechanical ventilation, and had shock and other organ failure.

### Diagnostic criteria for stroke

Based on the WHO criteria, stroke was defined as “rapidly developing clinical signs of focal (or global) disturbance of cerebral function, lasting more than 24 hours or leading to death, with no apparent cause other than that of vascular origin [18]. Because our medical institution was a designated hospital for treating the patients with COVID-19 during the pandemic, only plain CT scan was used for the imaging examination of the nervous system. Two neurologists and two neurosurgeons judged the stroke based on clinical manifestations and imaging studies: all patients had new neurological dysfunction after diagnosis of COVID-19, and abnormal intracranial changes were observed by CT examination, and the new neurological symptoms can be explained.

### Examination

All patients were positive for the coronavirus nucleic acid test from pharyngeal swabs or blood. The blood lymphocyte counts and proportions of all patients were lower than normal ( $0.8 \times 10^9/L$ ) at the time of admission, and the white blood cell counts and proportions of six patients were higher than normal value ( $10 \times 10^9/L$ ). The blood D-dimer levels in all patients were higher than normal value (243 ng/mL) before neurological symptoms, and the C-reactive protein values in all patients were also higher than normal value (8000  $\mu g/L$ ). The chest CT of all patients showed flaky or frosted glass like- high-density shadow in lungs (Figures 1, 2), pleural effusion was seen in 2 cases (Figure 3), and no obvious abnormalities in 4 cases. The

**Table 3. The general information of patients.**

|         | sex    | age | History of hypertension | Smoking | History of diabetes | Stroke history | Long-term residence |
|---------|--------|-----|-------------------------|---------|---------------------|----------------|---------------------|
| Case 1  | female | 64  | No                      | No      | No                  | No             | Wuhan, Hubei        |
| Case 2  | female | 81  | No                      | No      | No                  | No             | Wuhan, Hubei        |
| Case 3  | female | 68  | Yes                     | No      | Yes                 | No             | Wuhan, Hubei        |
| Case 4  | male   | 46  | Yes                     | Yes     | No                  | No             | Wuhan, Hubei        |
| Case 5  | female | 87  | No                      | No      | No                  | No             | Wuhan, Hubei        |
| Case 6  | male   | 70  | No                      | No      | No                  | No             | Wuhan, Hubei        |
| Case 7  | male   | 71  | No                      | Yes     | Yes                 | No             | Wuhan, Hubei        |
| Case 8  | female | 89  | Yes                     | No      | No                  | No             | Wuhan, Hubei        |
| Case 9  | male   | 84  | No                      | No      | Yes                 | No             | Wuhan, Hubei        |
| Case 10 | male   | 71  | Yes                     | No      | No                  | Yes            | Wuhan, Hubei        |
| Case 11 | female | 78  | Yes                     | No      | No                  | No             | Wuhan, Hubei        |

**Table 4. Clinical information.**

|        | Respiratory symptoms                                   | Fever | Initial D-dimer (ng/ml) | Classification of pneumonia | Neurological symptoms                               | Surgery/endovascular treatment | Prognosis after two weeks                                                                                                                                                                                                                             |
|--------|--------------------------------------------------------|-------|-------------------------|-----------------------------|-----------------------------------------------------|--------------------------------|-------------------------------------------------------------------------------------------------------------------------------------------------------------------------------------------------------------------------------------------------------|
| Case 1 | Cough, wheezing, chest tightness, difficulty breathing | No    | 640                     | Critical                    | Left sided hemiplegia                               | No                             | Relief of respiratory symptoms and improvement of hemiplegia, the patient was transferred to another hospital after showing negative results of two nucleic acid tests and positive result of IgG test                                                |
| Case 2 | Cough                                                  | No    | 681                     | Mild                        | Coma, right sided hemiplegia                        | No                             | Severe bacterial pneumonia, coma, no improvement in hemiplegia on the right limb. The patient was transferred to another hospital following the negative results of two nucleic acid tests and positive result of IgG test                            |
| Case 3 | Cough                                                  | Yes   | 981                     | Severe                      | Coma                                                | Yes                            | Died                                                                                                                                                                                                                                                  |
| Case 4 | Cough, diarrhea                                        | Yes   | 792                     | Mild                        | Light coma, left upper limb dyskinesia              | No                             | Relief of respiratory symptoms, recovery of consciousness, and recovery of left upper limb muscle strength compared to admission. The patient was discharged after showing negative results of two nucleic acid tests and positive result of IgG test |
| Case 5 | Cough, sputum, chest tightness, shortness              | Yes   | 4486                    | Severe                      | Coma, right facial paralysis, left sided hemiplegia | No                             | Severe pneumonia, respiratory failure, coma, no spontaneous breathing, and no improvement, the patient was discharged after showing negative results of two nucleic acid tests and positive result of IgG test                                        |
| Case 6 | Cough, sputum, chest tightness                         | No    | 1481                    | Severe                      | Coma, right sided hemiplegia                        | No                             | Drowsiness and hemiplegia on the right side. lung lesions were absorbed more than before, the patient was transferred to another                                                                                                                      |



|         |                                               |     |      |          |                                                                                                      |    |                                                                                                                                                                                                                                                                                                                                                             |
|---------|-----------------------------------------------|-----|------|----------|------------------------------------------------------------------------------------------------------|----|-------------------------------------------------------------------------------------------------------------------------------------------------------------------------------------------------------------------------------------------------------------------------------------------------------------------------------------------------------------|
| Case 7  | Fatigue, chest tightness                      | Yes | 1551 | Severe   | Reduced right limb muscle strength                                                                   | No | hospital after showing negative results of two nucleic acid tests and positive result of IgG test<br>Limb muscle strength were recovered from the previous condition, there was still fatigue and chest tightness, the patient was transferred to another hospital after showing negative results of two nucleic acid tests and positive result of IgG test |
| Case 8  | Expectoration, wheezing, difficulty breathing | Yes | 737  | Critical | Reduced left limb muscle strength                                                                    | No | Muscle strength of the limb was recovered from the previous condition, there was still fatigue and chest tightness. The patient showed positive result of nucleic acid test and is under treatment                                                                                                                                                          |
| Case 9  | Cough, fatigue                                | No  | 897  | Common   | Numbness and reduced muscle strength on right limb                                                   | No | Cough and fatigue were improved, right limb muscle strength was recovered compared to hospital admission, the patient was discharged after showing negative results of 2 nucleic acid tests and positive result of IgG test                                                                                                                                 |
| Case 10 | Cough, shortness                              | Yes | 694  | Severe   | Reduced right limb muscle strength (cerebral hemorrhage surgery 11 years ago, left sided hemiplegia) | No | Cough and shortness were improved, muscle strength on the right limb was recovered compared to admission. The patient was discharged after showing negative results of 2 nucleic acid tests and positive result of IgG test                                                                                                                                 |
| Case 11 | Cough, fatigue                                | Yes | 889  | Common   | numbness and dullness of left upper limb                                                             | No | Cough and fatigue were improved, the numbness and dull sensation of left upper limb were recovered compared to admission. The patient was discharged after showing negative results of 2 nucleic acid tests and positive result of IgG test                                                                                                                 |

head CT imaging indicated that one patient had brainstem hemorrhage with ventricular cast and hydrocephalus (Figure 4), two patients had a large area of uniform low-density shadow on the frontotemporal lobe on the head CT (Figure 5), four patients had multiple flaky low-density shadow on the parietal lobe (Figure 6), one patient showed flaky low-density shadow in the pons (Figure 7), and three patients could see point-like low density shadow in basal ganglia (Figure 8).

All patients were given different levels of oxygen support treatment (low flow oxygen intake, high flow oxygen intake, non-invasive ventilator-assisted breathing, endotracheal intubation ventilator-assisted breathing) at different stages according to their condition after admission, and were given antiviral treatment with Abidor and Chinese medicine for symptom improvement. After the occurrence of neurological symptoms, a patient with brain stem hemorrhage with break through into the ventricle was

given bilateral ventricle drainage surgery 15 hours after hemorrhage was found, and other patients with ischemic stroke were given strict blood pressure control, atorvastatin calcium, clopidogrel, and aspirin treatment,

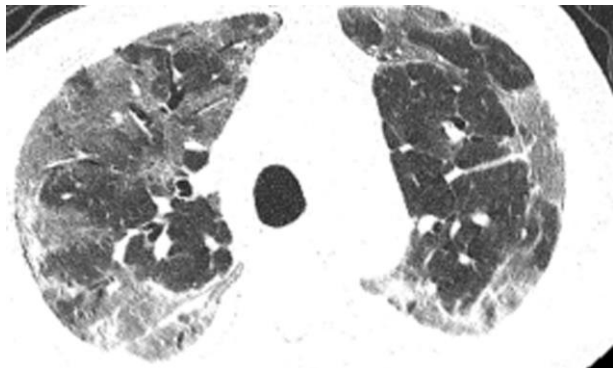

Figure 1. Case 4, flaky or frosted glass like- high-density shadow in both lungs.

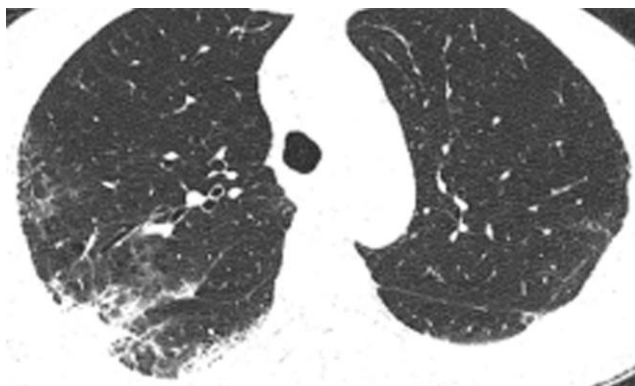

Figure 2. Case 5, focal high-density shadow in right lung.

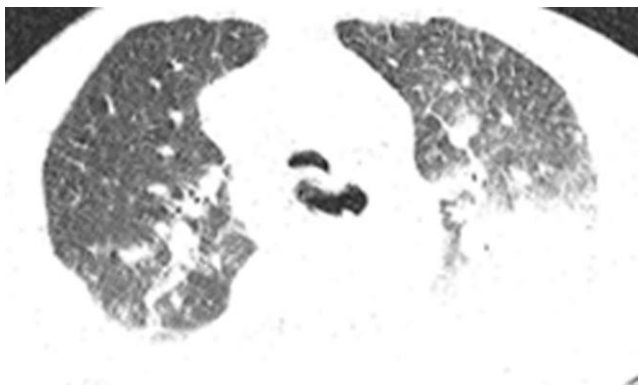

Figure 3. Case 6, flaky or frosted glass like- high-density shadow in both lungs with pleural effusion in left lung.

meantime the relevant indicators of embolism were closely checked.

### Statistical analysis

The age-standardized incidence of stroke was compared (Table 1). Differences between our cases and literature reports were analyzed by Pearson Chi-Square Test. For the D-dimer level of inpatients, median and Interquartile Range were used for data that were not normally distributed. Categorical variables were compared by

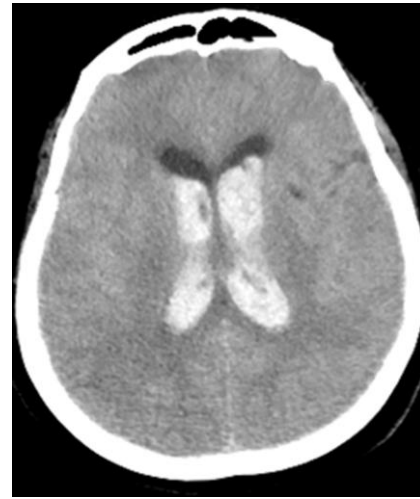

Figure 4. Case 3, head CT imaging: one patient had brainstem hemorrhage with ventricular cast and hydrocephalus.

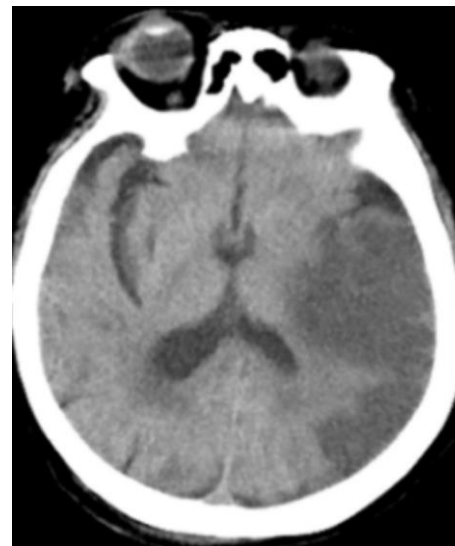

Figure 5. Case 2, a large area of uniform low-density shadow on the left frontotemporal lobe.

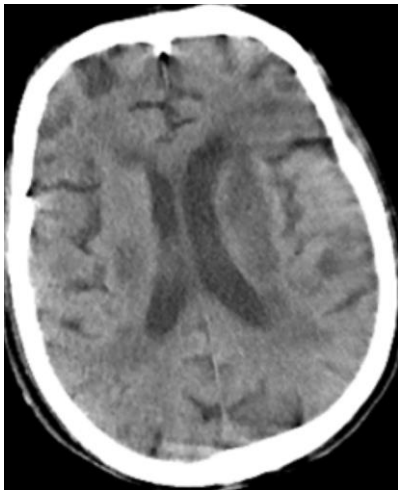

Figure 6. Case 6 multiple flaky low-density shadow on the parietal lobe.

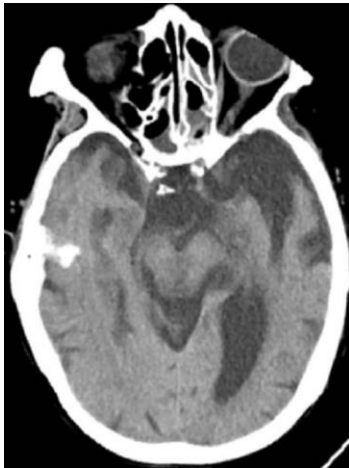

Figure 7. Case 5, flaky low-density shadow in the pons.

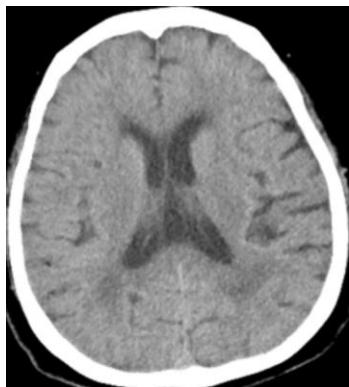

Figure 8. Case 11 point-like low density shadow in basal ganglia.

Mann-Whitney Test. All statistical analyses were performed using SPSS 22.0.

## AUTHOR CONTRIBUTIONS

Jingyu Chen: clinical data collection, literature reviewing and writing paper. Yazhou Wu: statistical analysis. Zhi Chen: stroke specialist, reviewing paper. Bin Yi: specialist in critical care medicine, providing case information. Lili Zhang: neurologist, providing case information. Changlin Yin: specialist in critical care medicine, providing case data, reviewing paper. Hua Feng: neuroscience specialist, reviewing paper. All authors have read and approved the final manuscript.

## CONFLICTS OF INTEREST

The authors declare no conflicts of interest.

## REFERENCES

1. Lozano R, Naghavi M, Foreman K, Lim S, Shibuya K, Aboyans V, Abraham J, Adair T, Aggarwal R, Ahn SY, Alvarado M, Anderson HR, Anderson LM, et al. Global and regional mortality from 235 causes of death for 20 age groups in 1990 and 2010: a systematic analysis for the global burden of disease study 2010. *Lancet*. 2012; 380:2095–128. [https://doi.org/10.1016/S0140-6736\(12\)61728-0](https://doi.org/10.1016/S0140-6736(12)61728-0) PMID:[23245604](https://pubmed.ncbi.nlm.nih.gov/23245604/)
2. Wang W, Jiang B, Sun H, Ru X, Sun D, Wang L, Wang L, Jiang Y, Li Y, Wang Y, Chen Z, Wu S, Zhang Y, et al, and NESS-China Investigators. Prevalence, incidence, and mortality of stroke in China: results from a nationwide population-based survey of 480 687 adults. *Circulation*. 2017; 135:759–71. <https://doi.org/10.1161/CIRCULATIONAHA.116.025250> PMID:[28052979](https://pubmed.ncbi.nlm.nih.gov/28052979/)
3. World Health Organization. Director-General's remarks at the media briefing on 2019-nCoV on 11 February 2020. (February 12, 2020). <https://www.who.int/dg/speeches/detail/who-director-general-s-remarks-at-the-media-briefing-on-2019-ncov-on-11-february-2020>
4. Vangen-Lønne AM, Wilsgaard T, Johnsen SH, Løchen ML, Njølstad I, Mathiesen EB. Declining incidence of ischemic stroke: what is the impact of changing risk factors? the tromsø study 1995 to 2012. *Stroke*. 2017; 48:544–50. <https://doi.org/10.1161/STROKEAHA.116.014377> PMID:[28188260](https://pubmed.ncbi.nlm.nih.gov/28188260/)
5. Oxley TJ, Mocco J, Majidi S, Kellner CP, Shoirah H, Singh IP, De Leacy RA, Shigematsu T, Ladner TR, Yaeger KA, Skliut M, Weinberger J, Dangayach NS, et al. Large-



- vessel stroke as a presenting feature of covid-19 in the youth. *N Engl J Med*. 2020; 382:e60.  
<https://doi.org/10.1056/NEJMc2009787>
6. Caplan LR. Intracranial branch atheromatous disease: a neglected, understudied, and underused concept. *Neurology*. 1989; 39:1246–50.  
<https://doi.org/10.1212/wnl.39.9.1246> PMID:2671793
  7. National Health Commission of the People's Republic of China. Diagnosis and treatment of the novel coronavirus pneumonia (Trial version 7) [D]. Published 2020.  
<http://www.nhc.gov.cn/yzygj/s7653p/202003/46c9294a7dfe4cef80dc7f5912eb1989/files/ce3e6945832a438eaae415350a8ce964.pdf>
  8. Desforges M, Favreau DJ, Brison E, Desjardins J, Meessen-Pinard M, Jacomy H, Talbot P. Human coronavirus: respiratory pathogens revisited as infectious neuroinvasive, neurotropic, and neurovirulent agents. CRC Press; 2013; pp. 93–122.  
<https://doi.org/10.1201/b13908-7>
  9. Mao L, Jin H, Wang M, Hu Y, Chen S, He Q, Chang J, Hong C, Zhou Y, Wang D, Miao X, Li Y, Hu B. Neurologic manifestations of hospitalized patients with coronavirus disease 2019 in Wuhan, China. *JAMA Neurol*. 2020; 77:683–90.  
<https://doi.org/10.1001/jamaneurol.2020.1127> PMID:32275288
  10. Sebastian S, Stein LK, Dhamoon MS. Infection as a stroke trigger. *Stroke*. 2019; 50:2216–18.  
<https://doi.org/10.1161/STROKEAHA.119.025872> PMID:31242826
  11. Kaptoge S, Di Angelantonio E, Lowe G, Pepys MB, Thompson SG, Collins R, Danesh J, and Emerging Risk Factors Collaboration. C-reactive protein concentration and risk of coronary heart disease, stroke, and mortality: an individual participant meta-analysis. *Lancet*. 2010; 375:132–40.  
[https://doi.org/10.1016/S0140-6736\(09\)61717-7](https://doi.org/10.1016/S0140-6736(09)61717-7) PMID:20031199
  12. Grau AJ, Boddy AW, Dukovic DA, Buggle F, Lichy C, Brandt T, Hacke W, and CAPRIE Investigators. Leukocyte count as an independent predictor of recurrent ischemic events. *Stroke*. 2004; 35:1147–52.  
<https://doi.org/10.1161/01.STR.0000124122.71702.64> PMID:15017013
  13. Elkind MS, Sciacca RR, Boden-Albala B, Rundek T, Paik MC, Sacco RL. Relative elevation in baseline leukocyte count predicts first cerebral infarction. *Neurology*. 2005; 64:2121–25.  
<https://doi.org/10.1212/01.WNL.0000165989.12122.49> PMID:15985584
  14. Danesh J, Lewington S, Thompson SG, Lowe GD, Collins R, Kostis JB, Wilson AC, Folsom AR, Wu K, Benderly M, Goldbourt U, Willeit J, Kiechl S, et al, and Fibrinogen Studies Collaboration. Plasma fibrinogen level and the risk of major cardiovascular diseases and nonvascular mortality: an individual participant meta-analysis. *JAMA*. 2005; 294:1799–809.  
<https://doi.org/10.1001/jama.294.14.1799> PMID:16219884
  15. Lee EJ, Nah HW, Kwon JY, Kang DW, Kwon SU, Kim JS. Ischemic stroke in patients with cancer: is it different from usual strokes? *Int J Stroke*. 2014; 9:406–12.  
<https://doi.org/10.1111/ij.s.12124> PMID:23981525
  16. Montaner J, Perea-Gainza M, Delgado P, Ribó M, Chacón P, Rosell A, Quintana M, Palacios ME, Molina CA, Alvarez-Sabín J. Etiologic diagnosis of ischemic stroke subtypes with plasma biomarkers. *Stroke*. 2008; 39:2280–87.  
<https://doi.org/10.1161/STROKEAHA.107.505354> PMID:18535284
  17. Chen N, Zhou M, Dong X, Qu J, Gong F, Han Y, Qiu Y, Wang J, Liu Y, Wei Y, Xia J, Yu T, Zhang X, Zhang L. Epidemiological and clinical characteristics of 99 cases of 2019 novel coronavirus pneumonia in Wuhan, China: a descriptive study. *Lancet*. 2020; 395:507–13.  
[https://doi.org/10.1016/S0140-6736\(20\)30211-7](https://doi.org/10.1016/S0140-6736(20)30211-7) PMID:32007143
  18. Aho K, Harmsen P, Hatano S, Marquardsen J, Smirnov VE, Strasser T. Cerebrovascular disease in the community: results of a WHO collaborative study. *Bull World Health Organ*. 1980; 58:113–30.  
PMID:6966542
